# Supplementary material for: Impact of Iron Mining Activity on the Endophytic Fungal Community of Aspilia grazielae
Source: MDPI journal article supplement (doi:10.3390/jof9060632), 2023-05-30
Supplement: s1 [file s1]

**Table S1.** Physicochemical properties of soil fertility in samples from the native vegetation area (NVA) and the recovery area (RCA).

| Parameters                         | NVA  |       |       |      |      |      | RCA   |      |      |      |      |      |
|------------------------------------|------|-------|-------|------|------|------|-------|------|------|------|------|------|
|                                    | NVA0 | NVA1  | NVA2  | NVA3 | NVA4 | NVA5 | RCA0  | RCA1 | RCA2 | RCA3 | RCA4 | RCA5 |
| O.M. mg/dm <sup>3</sup>            | 54.2 | 110.9 | 75.2  | 55.6 | 60.1 | 48.4 | 16.3  | 15.7 | 14.2 | 34.5 | 5.3  | 27.3 |
| pH                                 | 4.5  | 4.2   | 4.1   | 4    | 4.5  | 4.7  | 4.7   | 4.3  | 4.4  | 4.1  | 4.6  | 4.9  |
| S.B mmolc/dm <sup>3</sup>          | 37   | 62    | 37    | 14   | 46   | 48   | 16    | 6    | 4    | 7    | 5    | 15   |
| CTC mmolc/dm <sup>3</sup>          | 107  | 219   | 171   | 102  | 119  | 102  | 43    | 37   | 40   | 100  | 23   | 78   |
| V %                                | 35   | 28    | 22    | 14   | 38   | 47   | 37    | 17   | 10   | 7    | 20   | 33   |
| m %                                | 16   | 21    | 30    | 54   | 14   | 6    | 13    | 44   | 51   | 72   | 30   | 3    |
| H+Al mmolc/dm <sup>3</sup>         | 70   | 158   | 133   | 88   | 73   | 54   | 27    | 30   | 36   | 93   | 19   | 37   |
| P mg/dm <sup>3</sup>               | 5    | 10    | 9     | 5    | 6    | 3    | 4     | 3    | 2    | 2    | 2    | 7    |
| K mmol/dm <sup>3</sup>             | 2.6  | 4.4   | 3.2   | 2.3  | 4    | 2.7  | 1.4   | 1.5  | 0.6  | 2.3  | 0.4  | 2.4  |
| Ca mmolc/dm <sup>3</sup>           | 28   | 44    | 28    | 9    | 32   | 39   | 11    | 4    | 3    | 4    | 3    | 10   |
| Mg mmolc/dm <sup>3</sup>           | 7    | 13    | 6     | 3    | 9    | 7    | 3     | 1    | 1    | 1    | 1    | 6    |
| Al mmolc/dm <sup>3</sup>           | 7    | 16    | 16    | 17   | 7    | 3    | 4     | 5    | 4    | 17   | 2    | 1    |
| B mg/dm <sup>3</sup>               | 0.5  | 0.6   | 0.5   | 0.6  | 0.6  | 0.5  | 0.4   | 0.5  | 0.4  | 0.6  | 0.2  | 0.5  |
| Cu mg/dm <sup>3</sup>              | 1    | 1     | 1.3   | 0.9  | 0.4  | 1.2  | 0.3   | 0.4  | 0.6  | 0.3  | 0.1  | 0.5  |
| Fe mg/dm <sup>3</sup>              | 74.6 | 124.3 | 104.5 | 65.5 | 46.3 | 56.5 | 23.3  | 15.5 | 16.5 | 32.6 | 21.1 | 22.3 |
| Zn mg/dm <sup>3</sup>              | 0.5  | 1.1   | 0.9   | 0.6  | 0.4  | 0.3  | 0.4   | 0.2  | 0.2  | 0.2  | 0.2  | 0.5  |
| Mn mg/dm <sup>3</sup>              | 22.9 | 46.6  | 48.6  | 22.3 | 11.7 | 9.4  | 11.4  | 14.8 | 14.8 | 5    | 4.7  | 19.2 |
| SO <sub>4</sub> mg/dm <sup>3</sup> | 21   | 7     | 6     | 5    | 4    | 8    | 13    | 27   | 27   | 9    | 5    | 5    |
| Clay                               | 321  | 424   | 423   | 424  | 477  | 442  | 276.8 | 332  | 267  | 430  | 164  | 191  |
| Sand                               | 474  | 363   | 366   | 402  | 287  | 342  | 520.1 | 438  | 519  | 328  | 720  | 599  |
| Silt                               | 205  | 213   | 211   | 174  | 236  | 216  | 212   | 230  | 214  | 242  | 115  | 210  |

Legend: O. M. - Organic matter, pH - Hydrogen potential, S.B - Sum of bases, CTC - Cation exchange capacity, V - Base Saturation, m - Aluminium saturation, H+Al - Exchangeable acidity, P - Phosphor, K - Potassium, Ca - Calcium, Mg - Magnesium, Al - Aluminium, B - Boron, Cu - Copper, Fe - Iron, Zn - Zinc, Mn - Manganese, SO - Sulfates.

**Table S2.** Relative abundance of OTUs taxa (%)  $\geq 0.5$  found in plant tissues (roots and leaves) of *Aspillia graziellae* (Ascomycota Phylum).

| Classes         | Orders         | Families           | Genera                    | Roots |      | Leaves |      |
|-----------------|----------------|--------------------|---------------------------|-------|------|--------|------|
|                 |                |                    |                           | NVA   | RCA  | NVA    | RCA  |
| Dothideomycetes | Capnodiales    | Incetiae sedis     | <i>Toxicocladosporium</i> | *     | *    | 0.67   | 0.06 |
|                 |                |                    | <i>Cladosporium</i>       | 0.88  | 0.97 | 0.94   | 1.47 |
|                 |                | Mycosphaerellaceae | <i>Mycosphaerella</i>     | *     | *    | 1.34   | 0.84 |
|                 |                |                    | <i>Passalora</i>          | *     | *    | 0.59   | 0.56 |
|                 | Dothideales    | Dothioraceae       | <i>Aureobasidium</i>      | *     | *    | 2.49   | 2.38 |
|                 |                |                    | <i>Curvularia</i>         | *     | *    | 0.59   | 0.07 |
|                 | Pleosporales   | Pleosporaceae      | <i>Leptosphaerulina</i>   | *     | *    | 0.51   | 0.63 |
|                 |                |                    | <i>Phoma</i>              | 0.36  | 0.41 | 0.71   | 1.62 |
|                 | Eurotiales     | Trichocomaceae     | <i>Aspergillus</i>        | 0.44  | 0.62 | 0.33   | 0.21 |
|                 |                |                    | <i>Eurotium</i>           | 0.46  | 0.44 | 0.28   | 0.27 |
| Lecanoromycetes | Teloschistales | Teloschistaceae    | <i>Penicillium</i>        | 10.17 | 4.45 | 5.97   | 4.88 |
|                 |                |                    | <i>Xanthoria</i>          | *     | *    | 0.47   | 0.30 |
|                 | Diaporthales   | Valsaceae          | <i>Phomopsis</i>          | 0.04  | 1.57 | 0.43   | 0.30 |
|                 |                |                    | <i>Trichoderma</i>        | 5.81  | 0.34 | 5.27   | 6.12 |
| Sordariomycetes | Hypocreales    | Nectriaceae        | <i>Fusarium</i>           | 2.05  | 2.08 | 1.14   | 1.12 |
|                 |                |                    | <i>Pestalotiopsis</i>     | *     | *    | 0.49   | 0.40 |

Legend: OTUs - operational taxonomic units; NVA - native vegetation area; RCA - recovery area (RCA); \* - OTUs at genus level identified with Relative abundance  $\leq 0.0001$ .
